# Supplementary material
Source: PubMed Central journal article supplement (PMC3486173)
Supplement: MCB.00860-12_zmb999109743so1.pdf [file MCB.00860-12_zmb999109743so1.pdf]

Supplemental Table 1: Inverse PCR primers

| Primer Name           | Sequence (5'-3')            | Note                                   |
|-----------------------|-----------------------------|----------------------------------------|
| NeoGenoRev            | TGGATTCATCGACTGTGGCCGGCT    | iPCR First Round,<br>5'-breakpoint PCR |
| Neo3out1              | CGGCATCAGAGCAGCCGATTGTCT    | iPCR First Round                       |
| SV40Pro               | TCCTCACTACTTCTGGAATAGCTCAGA | iPCR Second Round                      |
| Neo5out1              | GTTGTCACTGAAGCGGGAAGGGACT   | iPCR Second Round                      |
| SVA 223 Rev           | CAGCGAAACCCCGTCTCCAC        | 5'-breakpoint PCR                      |
| U2OS_SVAH2_Clone1_F1  | ATTAATCTGCACTGGGTATCTGCAA   | 5'-breakpoint PCR                      |
| U2OS_SVAH2_Clone3_F1  | CTGTGCCACCTGGATCTAT         | 5'-breakpoint PCR                      |
| U2OS_SVAH2_Clone4_F1  | AGACTCCTGGGCAACCTTTT        | 5'-breakpoint PCR                      |
| U2OS_SVAH2_Clone5_F1  | GTGTCTTCCTGGCTCCTGGT        | 5'-breakpoint PCR                      |
| U2OS_SVAH2_Clone6_F3  | ATTTTCCTCCAACCTCAAGAATGAA   | 5'-breakpoint PCR                      |
| U2OS_SVAH2_Clone7_F1  | ACTCCTGCCCAACTTGTGAC        | 5'-breakpoint PCR                      |
| U2OS_SVAH2_Clone10_F1 | AGAATAGGGTGCGGGAGACT        | 5'-breakpoint PCR                      |
| U2OS_SVAH2_Clone11_F2 | GCTAGTCACATCAGCCCACA        | 5'-breakpoint PCR                      |
| U2OS_SVAH2_Clone12_F1 | CGGCATCCAACAGGTAGTTTTT      | 5'-breakpoint PCR                      |
| U2OS_SVAH2_Clone13_F1 | TACCACATGTACGGGAAACACATC    | 5'-breakpoint PCR                      |
